# Supplementary material
Source: PubMed Central journal article supplement (PMC2868438)
Supplement: supp_51_3_1304__1.pdf [file supp_51_3_1304__1.pdf]

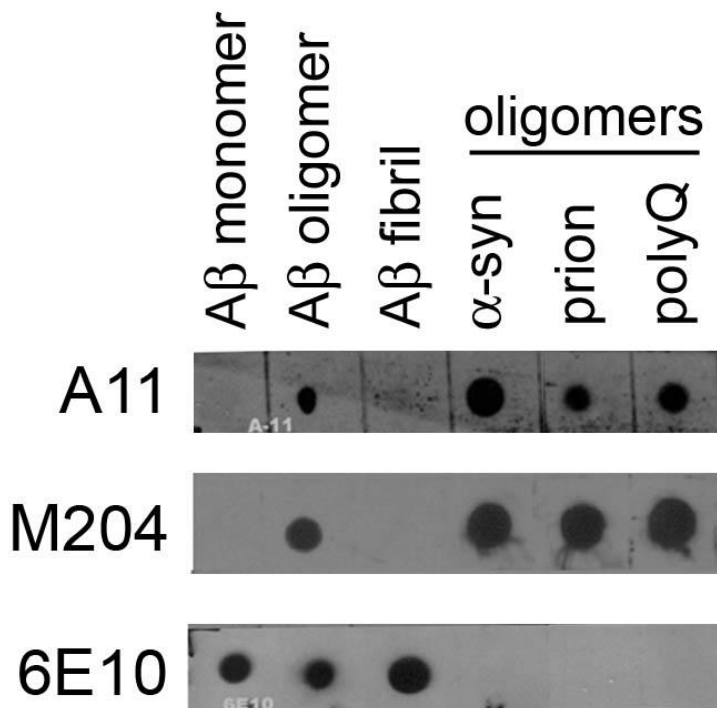

**Supplementary Figure S1.** Polyclonal A11 antibody and monoclonal M204 antibody recognize oligomers but not monomers or fibrils. Similar quantities of proteins or peptides (40 nmol) were spotted onto nitrocellulose membrane and incubated with the respective antibodies. Signals were detected by enhanced chemiluminescence (ECL).
